# Supplementary material
Source: Springer Nature journal article supplement (https://www.springerprofessional.de/resource/supplementary/13638_2010_17_MOESM8_ESM.pdf/11897214)

### Delay Vs Number fo Nodes

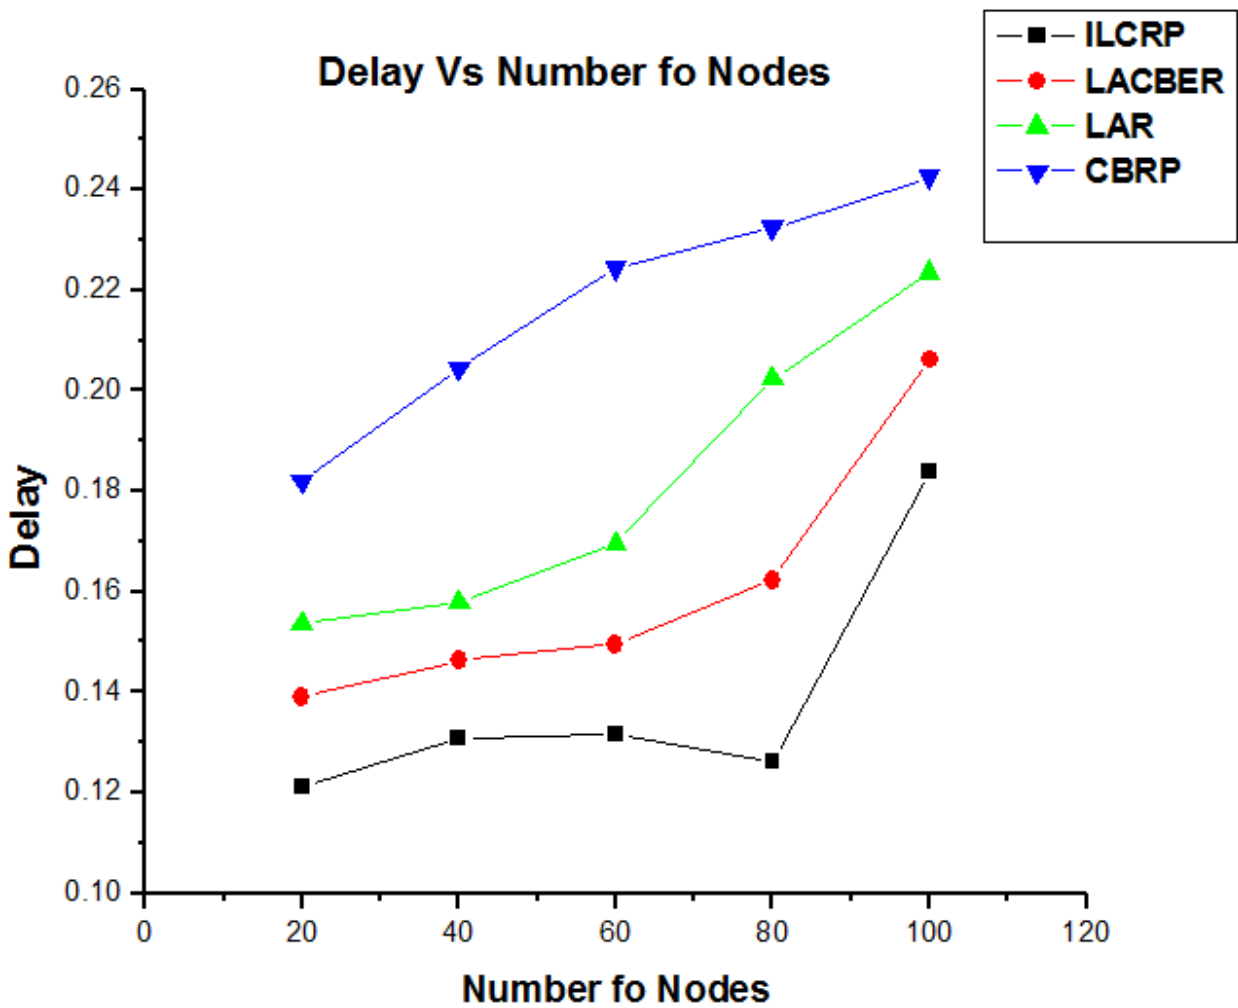

Supplement: MOESM8 [file 11897214]
